# Supplementary material for: Versatile routes to selenoether functionalised tertiary phosphines
Source: Royal Society of Chemistry journal article supplement (doi:10.1039/c0dt00004c), 2010-01-01

Electronic Supplementary Information for Dalton Trans.

### **Versatile Routes to Selenoether Functionalised Tertiary Phosphines**

Tom J. Cunningham, Mark R. J. Elsegood, Paul F. Kelly, Martin B. Smith<sup>\*</sup> and Paul M. Staniland

*Department of Chemistry, Loughborough University, Loughborough,  
Leicestershire, UK, LE11 3TU*

---

<sup>\*</sup> To whom correspondence should be addressed. E-mail: m.b.smith@lboro.ac.uk. Tel: +44 (0)1509 222553. Fax: +44 (0)1509 223925.

## Experimental Section

**Materials.** Reactions were carried out under aerobic conditions unless otherwise stated. Dichloromethane was previously distilled over CaH<sub>2</sub> and diethyl ether over sodium/benzophenone. All chemicals were obtained from commercial suppliers and used without further purification. AdPH was a kind donation from Cytec Canada Inc. The bromophosphine 2-Ph<sub>2</sub>PC<sub>6</sub>H<sub>4</sub>Br **1a** was prepared according to a previously reported procedure.<sup>1</sup> The metal precursors PdCl<sub>2</sub>(PhCN)<sub>2</sub> and MCl<sub>2</sub>(cod) (M = Pd, Pt) were synthesised according to known procedures.<sup>2,3</sup>

**Instrumentation.** FT–IR spectra were recorded as pressed KBr pellets over the range 4000–400 cm<sup>–1</sup> using a Perkin-Elmer system 2000 FT spectrometer. <sup>1</sup>H NMR and <sup>31</sup>P{<sup>1</sup>H} NMR spectra were recorded on a Bruker DPX-400 FT spectrometer with chemical shifts (δ) reported relative to external TMS or 85% H<sub>3</sub>PO<sub>4</sub>. Coupling constants (*J*) in Hz. All NMR spectra were recorded in CDCl<sub>3</sub> solutions at *ca.* 298 K. Elemental analyses (Perkin-Elmer 2400 CHN or Exeter Analytical, Inc. CE-440 Elemental Analyzers) were performed by the Loughborough University Analytical Service within the Department of Chemistry. Compound **1b** was analysed (JEOL SX102 instrument) by fast atom bombardment (FAB) in a positive ionization mode using a 3-nitrobenzyl alcohol (NOBA) matrix. Compounds **2a**, **3a** and **3b** were analysed (Finnigan MAT 95XP instrument) by low-resolution EI (positive ionisation mode) using CH<sub>2</sub>Cl<sub>2</sub>/CH<sub>3</sub>OH as the solvent.

**Preparation of 2-AdPC<sub>6</sub>H<sub>4</sub>Br, 1b.** To a DMA solution (70 cm<sup>3</sup>) of Pd(OAc)<sub>2</sub> (10.6 cm<sup>3</sup> of a 5 × 10<sup>–3</sup> mol solution, 0.05 mmol) and K(OAc) (2.07 g, 29.2 mmol) was added 1,2-bromo(iodo)benzene (7.5 g, 26.5 mmol) and thoroughly purged with N<sub>2</sub>. AdPH (4.9 g, 26.5 mmol) in DMA (30 cm<sup>3</sup>) was added dropwise over 20 min and the mixture heated to reflux for 2 d under N<sub>2</sub>. The solution was cooled, distilled water (50 cm<sup>3</sup>) added and the product extracted into CH<sub>2</sub>Cl<sub>2</sub> (2 × 50 cm<sup>3</sup>). The organic extracts were combined, washed with saturated KCl solution (50 cm<sup>3</sup>) and dried over anhydrous MgSO<sub>4</sub>. The solution was concentrated under reduced pressure to *ca.* 20 cm<sup>3</sup> and stored at 0 °C. Solid **1b** was filtered off, washed with cold absolute ethanol (2 × 10 cm<sup>3</sup>) and dried *in vacuo*. Yield: 5.3 g, 55%. Selected spectroscopic data for **1b**: δ<sub>P</sub> (162 MHz: CDCl<sub>3</sub>) –29.6 ppm. δ<sub>H</sub> (400 MHz: CDCl<sub>3</sub>): 8.19 (dt, 1H, arom. H), 7.55 (ddd, 1H, arom. H), 7.26 (dt, 1H, arom. H), 7.15 (dt, 1H, arom. H), 2.07–1.33 (m, 16H, PAd) ppm. FAB–MS 371 [M<sup>+</sup>]. Found: C, 49.34; H, 5.29; C<sub>16</sub>H<sub>20</sub>O<sub>3</sub>BrP·H<sub>2</sub>O requires C, 49.37; H, 5.71.

**Preparation of 2-Ph<sub>2</sub>PC<sub>6</sub>H<sub>4</sub>SePh, 2a.** Freshly ground KOH (0.284 g, 5.05 mmol) was dissolved in DMA (50 cm<sup>3</sup>), PhSeH (0.579 g, 2.53 mmol) added and the orange solution purged with N<sub>2</sub>. Compound **1a** (0.784 g, 2.30 mmol), dissolved in DMA (30 cm<sup>3</sup>), was added to the stirred PhSeH solution over 5 min. After heating at 170 °C for 3d, the solution was cooled and distilled water (80 cm<sup>3</sup>) added. After extraction with CH<sub>2</sub>Cl<sub>2</sub> (2 × 50 cm<sup>3</sup>), the organic extracts were combined, washed with water (50 cm<sup>3</sup>), the organic layer separated and dried over anhydrous MgSO<sub>4</sub>. The volume was reduced to *ca.* 5–10 cm<sup>3</sup>, distilled water added to afford a white suspension that was stirred overnight. Decantation of the solvent followed by addition of cold absolute EtOH (40 cm<sup>3</sup>) gave an off-white solid **2a** which was collected by filtration and dried *in vacuo*. Yield: 0.504 g, 53%. Selected spectroscopic data for **2a**: δ<sub>P</sub> (162 MHz: CDCl<sub>3</sub>) –10.0 ppm, <sup>3</sup>*J*<sub>PSe</sub> 139 Hz. δ<sub>H</sub> (400 MHz: CDCl<sub>3</sub>): 7.46–7.12 (m, 19H, arom. H) ppm. FAB–MS 418 [M<sup>+</sup>]. Found: C, 68.06; H, 4.58; C<sub>24</sub>H<sub>19</sub>PSe·0.25H<sub>2</sub>O requires C, 68.33; H, 4.67.

**Preparation of 2-AdPC<sub>6</sub>H<sub>4</sub>SePh, 2b.** Compound **1b** (0.373 g, 1.005 mmol), dissolved in DMA (30 cm<sup>3</sup>), was added dropwise to a solution of PhSeH (0.158 g, 1.005 mmol) and KOH (0.085 g, 1.110 mmol) in DMA (30 cm<sup>3</sup>). The mixture was stirred at 160 °C for 7 d under N<sub>2</sub>, cooled and water (60 cm<sup>3</sup>) added to afford a light brown suspension. CH<sub>2</sub>Cl<sub>2</sub> (2 × 60 cm<sup>3</sup>) was added and the combined extracts washed with water (60 cm<sup>3</sup>), separated and the organic layer dried over anhydrous MgSO<sub>4</sub>.

Reduction of the solvent to *ca.* 15 cm<sup>3</sup>, precipitation with water (30 cm<sup>3</sup>) gave a cloudy suspension that was stirred for 12 h affording a brown solid. The solvent was decanted, cold absolute ethanol (20 cm<sup>3</sup>) added and **2b** filtered and dried *in vacuo*. Yield: 0.178 g (40%). Selected spectroscopic data for **2b**:  $\delta_P$  (162 MHz: CDCl<sub>3</sub>) –34.6 ppm,  $^3J_{PSe}$  201 Hz.  $\delta_H$  (400 MHz: CDCl<sub>3</sub>): 8.10 (dt, 1H, arom. H), 7.51–7.27 (m, 5H, arom. H), 7.09 (dt, 1H, arom. H), 7.05 (dt, 1H, arom. H), 6.97 (ddd, 1H, arom. H), 2.10–1.35 (m, 16H, PAd) ppm. Found: C 58.52, H 5.65; C<sub>22</sub>H<sub>25</sub>PO<sub>3</sub>Se requires C 59.07, H 5.63. Suitable crystals for X-ray crystallography were obtained by vapour diffusion of diethyl ether into a CDCl<sub>3</sub> solution of **2b**.

**Preparation of PtCl<sub>2</sub>(2-Ph<sub>2</sub>PC<sub>6</sub>H<sub>4</sub>SePh) 3a.** To a CH<sub>2</sub>Cl<sub>2</sub> (10 cm<sup>3</sup>) of PtCl<sub>2</sub>(cod) (0.074 g, 0.20 mmol) was added solid **2a** (0.093 g, 0.22 mmol) in one portion. The yellow solution was stirred for 35 min and the volume concentrated, under reduced pressure, to *ca.* 2–3 cm<sup>3</sup>. Addition of diethyl ether (20 cm<sup>3</sup>) afforded **3a** which was collected by suction filtration and dried *in vacuo*. Yield: 0.130 g, 96%. Selected spectroscopic data for **3a**:  $\delta_P$  (162 MHz: CDCl<sub>3</sub>) 36.6 ppm,  $^1J_{PtP}$  3555 Hz,  $^2J_{PSe}$  68 Hz.  $\delta_H$  (400 MHz: CDCl<sub>3</sub>): 7.85–7.15 (m, 19H, arom. H) ppm. EI–MS 684 [M<sup>+</sup>]. Found: C, 42.42; H, 2.97; C<sub>24</sub>H<sub>19</sub>Cl<sub>2</sub>PPtSe requires C, 42.18; H, 2.81. Suitable crystals for X-ray crystallography were obtained by vapour diffusion of diethyl ether into a CDCl<sub>3</sub>/(CH<sub>3</sub>)<sub>2</sub>SO solution of **3a**.

**Preparation of PdCl<sub>2</sub>(2-AdPC<sub>6</sub>H<sub>4</sub>SePh) 3b.** To a CH<sub>2</sub>Cl<sub>2</sub> (7 cm<sup>3</sup>) of PdCl<sub>2</sub>(PhCN)<sub>2</sub> (0.031 g, 0.082 mmol) was dropwise added a CH<sub>2</sub>Cl<sub>2</sub> (7 cm<sup>3</sup>) solution of **2b** (0.037 g, 0.082 mmol) over 10 min. The yellow solution was stirred for *ca.* 3.5 h, the volume concentrated under reduced pressure to *ca.* 2–3 cm<sup>3</sup> and Et<sub>2</sub>O (20 cm<sup>3</sup>)/petroleum ether (60–80°C, 50 cm<sup>3</sup>) added. The solid **3b** was collected by suction filtration and dried *in vacuo*. Yield: 0.031 g, 61%. Selected spectroscopic data for **3b**:  $\delta_P$  (162 MHz: CDCl<sub>3</sub>) 46.6, 45.9 ppm.  $\delta_H$  (400 MHz: CDCl<sub>3</sub>): 8.48 (t, 1H, arom. H), 8.42 (m, 1H, arom. H), 7.88 (d, 1H, arom. H), 7.73–7.25 (m, 15H, arom. H), 4.13 (m, 2H, CH<sub>2</sub>), 2.16–0.92 (m, 30H, PAd) ppm. EI–MS 590 [M–Cl<sup>+</sup>] Found: C, 41.76; H, 3.81; C<sub>22</sub>H<sub>25</sub>Cl<sub>2</sub>PO<sub>3</sub>PdSe requires C, 41.38; H, 3.97. Suitable crystals for X-ray crystallography were obtained by vapour diffusion of diethyl ether into a CH<sub>2</sub>Cl<sub>2</sub> solution of **3b**.

**Preparation of Ph<sub>2</sub>P(CH<sub>2</sub>)<sub>2</sub>SePh, 4.** Vinyldiphenylphosphine (0.30 g, 1.41 mmol) was placed in a Schlenk tube and heated to 110 °C. Selenophenol (0.22 g, 1.40 mmol) was added and the reaction mixture stirred for 5 min. After addition of AIBN (0.05 g), the mixture was stirred at 110 °C for 14 h. Whilst at 80 °C the contents of the Schlenk tube were placed under vacuum for 6 h to remove any volatile side products. Solid **4** was collected, after cooling, and used directly in co-ordination studies. Selected spectroscopic data for **4**:  $\delta_P$  (162 MHz: CDCl<sub>3</sub>) –15.4 ppm.  $\delta_H$  (400 MHz: CDCl<sub>3</sub>): 7.68–7.15 (m, 15H, arom. H), 2.99 (m, 2H, CH<sub>2</sub>), 2.56 (m, 2H, CH<sub>2</sub>) ppm. Found: C, 64.40; H, 5.16; C<sub>20</sub>H<sub>19</sub>PSe requires C, 65.05; H, 5.20.

**Preparation of PdCl<sub>2</sub>{Ph<sub>2</sub>P(CH<sub>2</sub>)<sub>2</sub>SePh}, 5.** To a CH<sub>2</sub>Cl<sub>2</sub> (10 cm<sup>3</sup>) of PdCl<sub>2</sub>(cod) (0.077 g, 0.27 mmol) was dropwise added a CH<sub>2</sub>Cl<sub>2</sub> (5 cm<sup>3</sup>) of **4** (0.10 g, 0.27 mmol) over 10 min. The solution was stirred for *ca.* 2 h, the volume concentrated under reduced pressure to *ca.* 2–3 cm<sup>3</sup> and Et<sub>2</sub>O (60 cm<sup>3</sup>) added. The solid **5** was collected by suction filtration and dried *in vacuo*. Yield: 0.081 g, 55%. Selected spectroscopic data for **5**:  $\delta_P$  (162 MHz: CDCl<sub>3</sub>) 62.3 ppm.  $\delta_H$  (400 MHz: CDCl<sub>3</sub>): 8.00–7.35 (m, 15H, arom. H), 3.24 (m, 1H, CH<sub>2</sub>), 2.84 (m, 3H, CH<sub>2</sub>) ppm. Found: C, 43.62; H, 3.16; C<sub>20</sub>H<sub>19</sub>Cl<sub>2</sub>PPdSe requires C, 43.95; H, 3.50.

## References

1. P. Machnitzki, T. Nickel, O. Stelzer and C. Landgrafe, *Eur. J. Inorg. Chem.*, 1998, 1029.
2. D. Drew and J. R. Doyle, *Inorg. Synth.*, 1972, **13**, 47
3. J. X. McDermott, J. F. White and G. M. Whitesides, *J. Am. Chem. Soc.*, 1976, **98**, 6521.

### **Additional Single Crystal X-ray Figures**

Further figures for all crystallographically characterised compounds reported are included.

**ESIFIG1** for **2a** showing the full atom numbering scheme.

**ESIFIG2** for **3a** showing the full atom numbering scheme.

**ESIFIG2** for **3b** showing the full atom numbering scheme.

**Additional Single Crystal X-ray Figures (for 2a, 3a and 3b)**

**ESIFIG1** for **2a** showing the full atom numbering scheme.

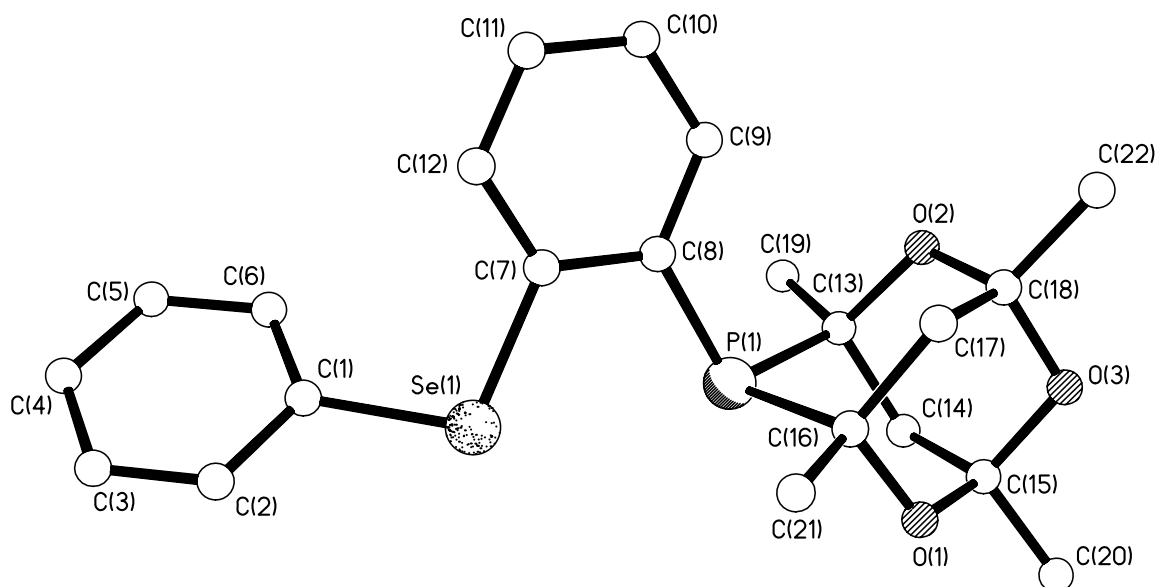

**ESIFIG2** for **3a** showing the full atom numbering scheme.

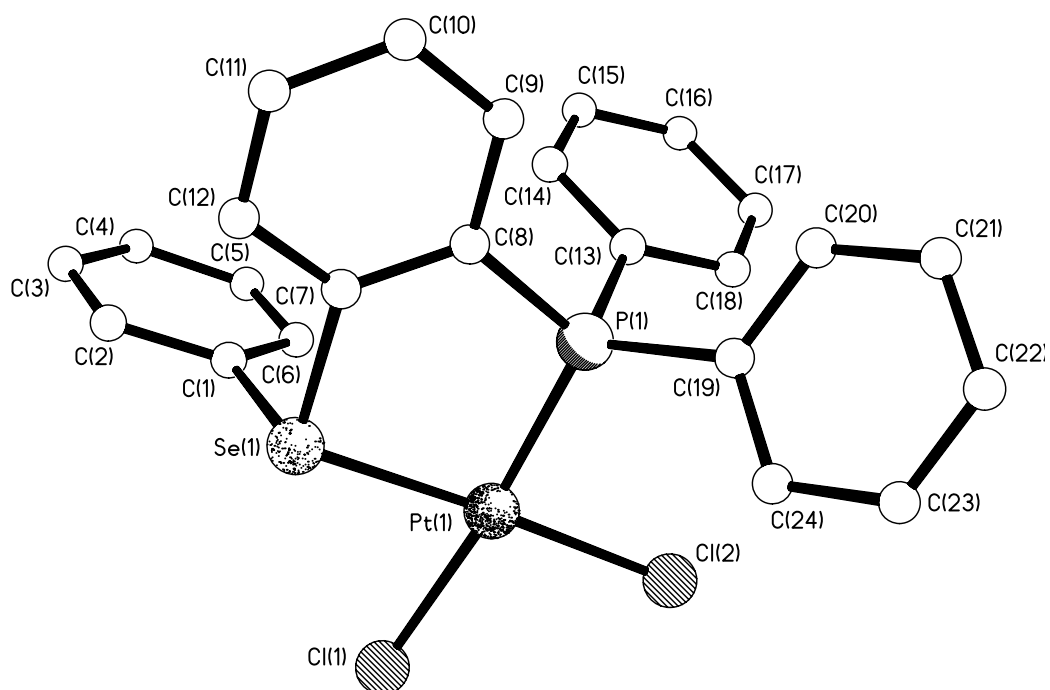

**ESIFIG3** for **3b** showing the full atom numbering scheme.

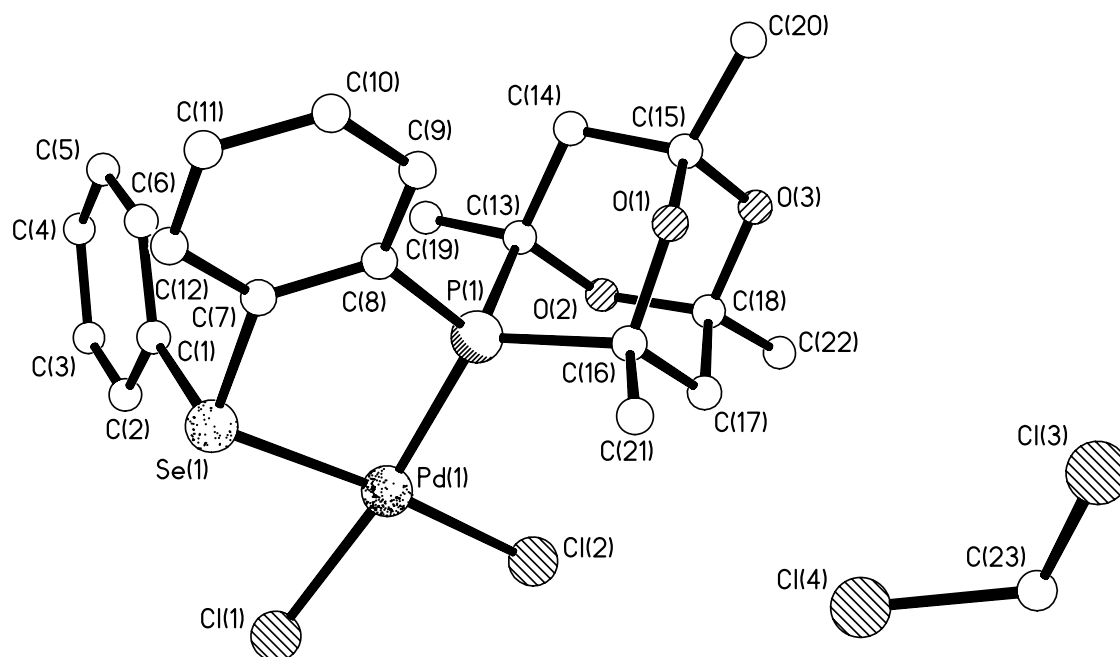

Supplement: c0dt00004c.pdf [file c0dt00004c.pdf]
